# Supplementary material
Source: PubMed Central journal article supplement (PMC4777633)
Supplement: NIHMS745044-supplement-1.pdf [file NIHMS745044-supplement-1.pdf]

## **Supplementary Information.**

### **Human ‘brite / beige’ adipocytes develop from capillary networks and improve metabolic homeostasis**

So Yun Min, Jamie Kady, Minwoo Nam, Raziell Rojas-Rodriguez, Aaron Berkenwald, Jong Hun Kim, Hye-Lim Noh, Jason K. Kim, Marcus P. Cooper, Timothy Fitzgibbons, Michael A. Brehm and Silvia Corvera.

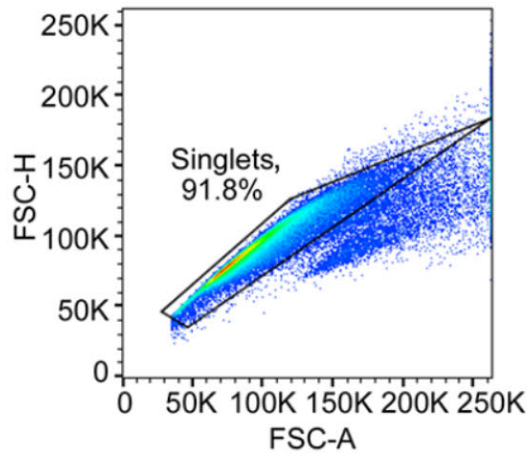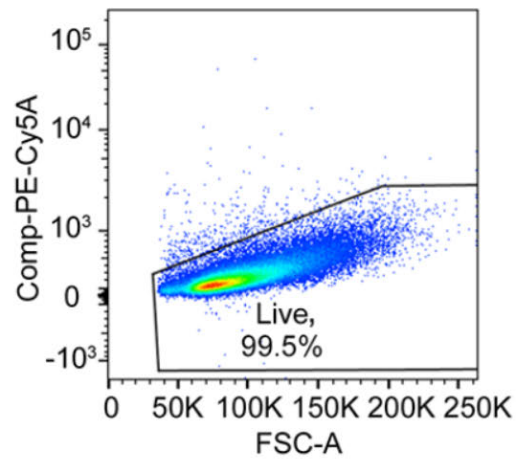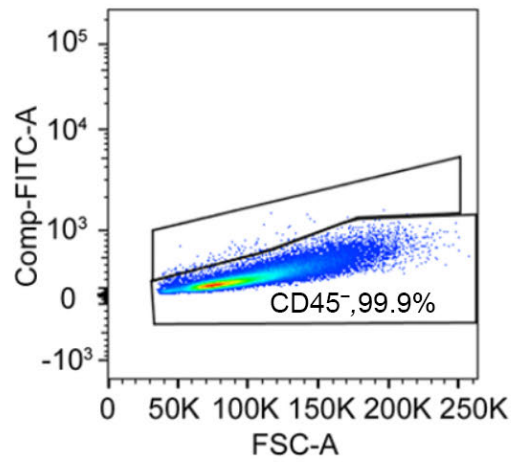

**Supplementary Figure 1. FACS sorting of single, live cells from capillary networks used for clonal analysis.**

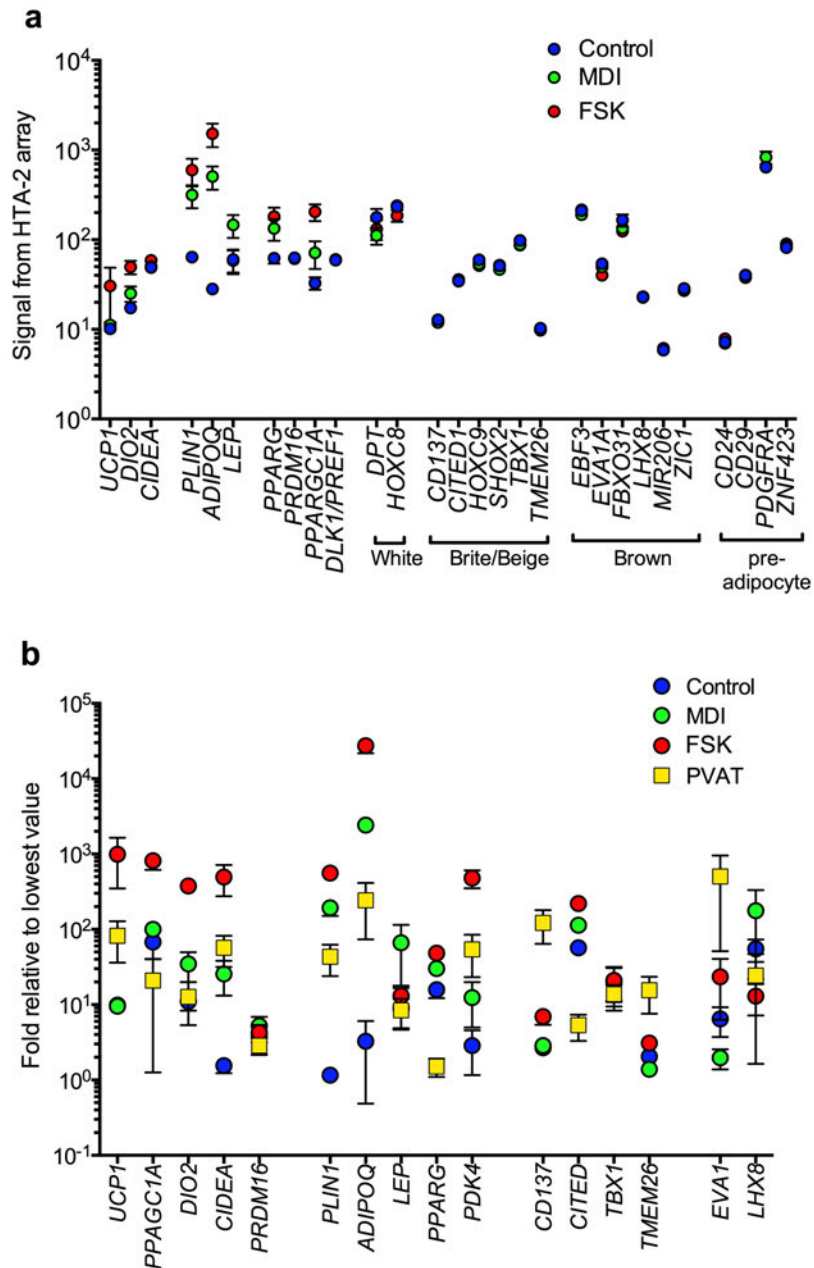

**Supplementary Figure 2. Expression of pre-adipocyte and beige/brown adipocyte markers in cells from human capillary networks.** **a)** Mean probe intensity values obtained in HTA-2.0 Affymetrix arrays for the genes indicated on the x-axis, for cells without exposure to differentiation cocktail (Control), exposed to MDI for 3 days and cultured for an additional 11 days (MDI), or treated as in MDI but exposed to forskolin for 7 days prior to RNA extraction (FSK). **b)** RT-PCR analysis for genes indicated in the x-axis, for cells prepared as described in (a), compared to samples from peri-carotid fat obtained from 4 individuals. Values are expressed as the fold over the lowest detected value in the set for each gene. Values for C, MDI and FSK represent the mean and SEM from cells derived from three individuals.

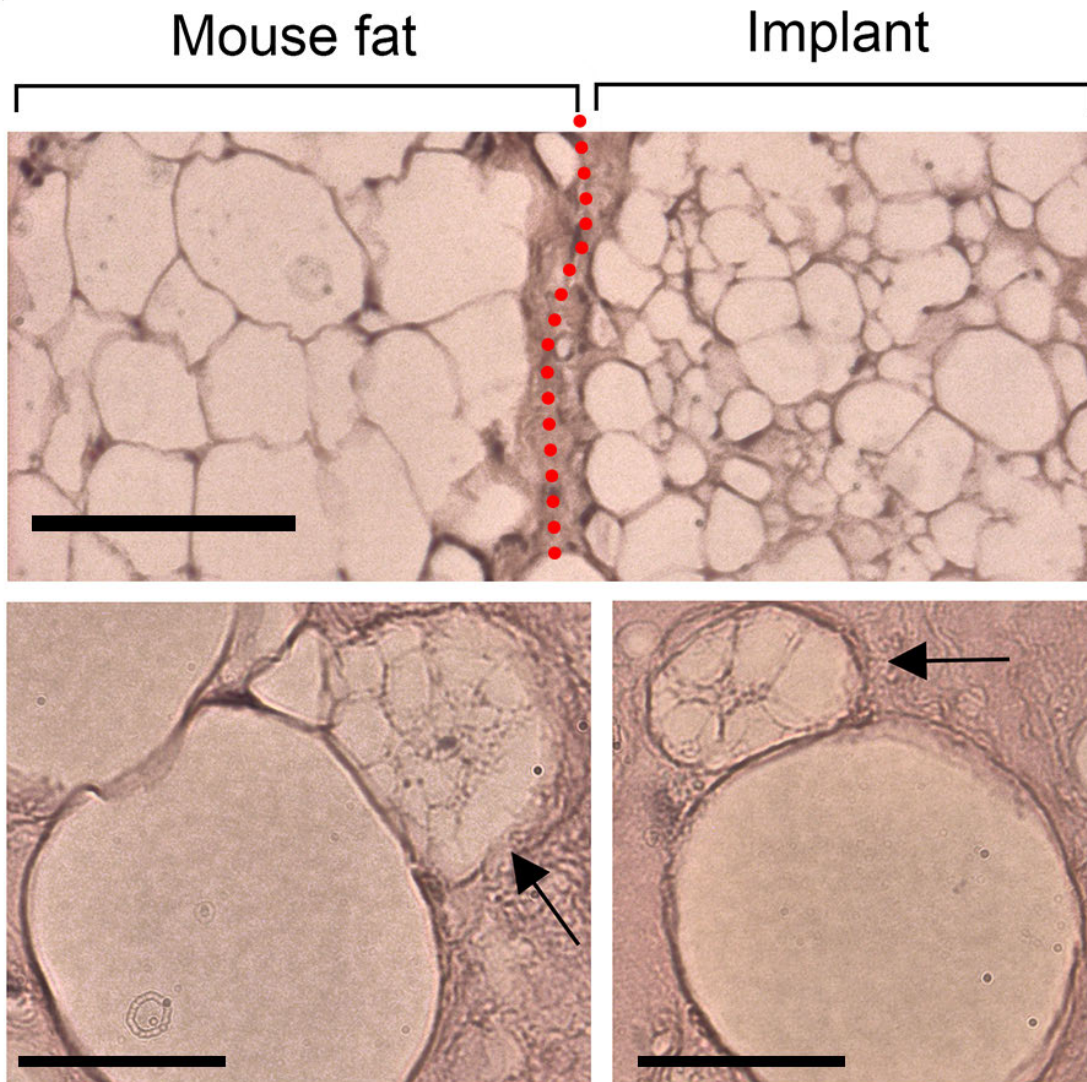

**Supplementary Figure 3. Multilocular adipocytes in implants of human ‘brite/beige’ cells.** H&E staining of adipose structure formed from implanted human cells. The adjacent regions of host adipose tissue and implanted cells are indicated by the red dotted line (top), and arrows (bottom) point to examples of multilocular cells in the sections. Scale bars, 200  $\mu\text{m}$  (top), and 25  $\mu\text{m}$  (bottom).

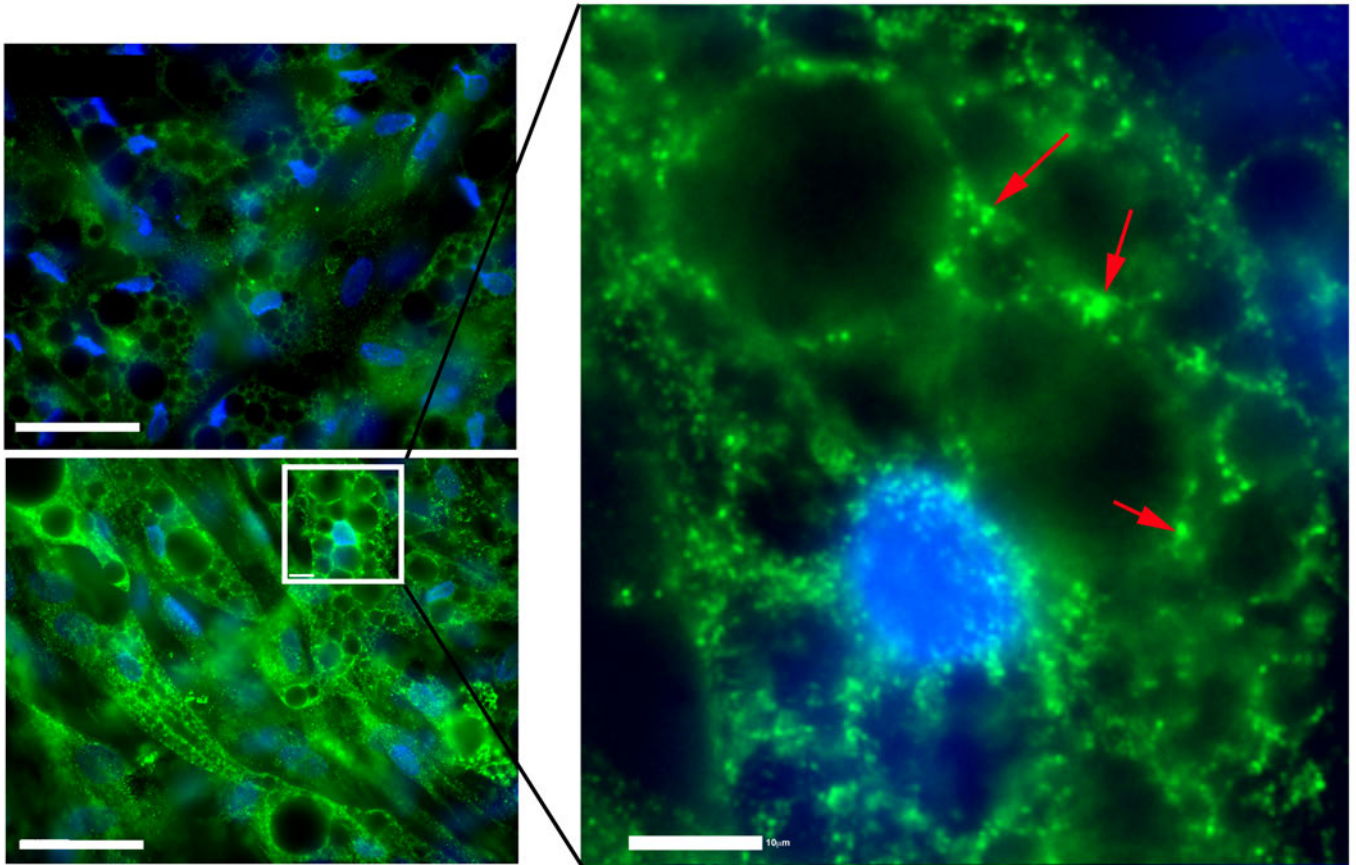

**Supplementary Figure 4. Expression of IL-33 in ‘brite/beige’ adipocytes.** Cells isolated from capillary networks were sub-cultured on coverslips, grown to confluence and subjected to adipogenic differentiation. Differentiated cells (top left) or differentiated cells treated with forskolin for 7 days (bottom left), were fixed, permeabilized and stained with antibody to human IL-33. Scale bars, 25  $\mu\text{m}$  and 10  $\mu\text{m}$  (enlargement, right). Arrows point to numerous vesicular structures containing IL-33.

**Supplementary Table 1: Patient characteristics**

| <b>Experiment</b>                           | <b>Patient</b> | <b>Age</b> | <b>Gender</b> | <b>Type of Surgery</b> | <b>BMI</b> | <b>DM</b> | <b>Insulin</b> | <b>Oral hypoglycemic</b> | <b>HMG CoA Reductase Inhibitor</b> |
|---------------------------------------------|----------------|------------|---------------|------------------------|------------|-----------|----------------|--------------------------|------------------------------------|
| Neck adipose tissue                         | 1              | 64         | M             | CEA                    | 29         | No        | No             | No                       | Yes                                |
|                                             | 2              | 57         | M             | CEA                    | 28         | No        | No             | No                       | Yes                                |
|                                             | 3              | 59         | F             | CEA                    | 25         | No        | No             | No                       | Yes                                |
|                                             | 4              | 77         | F             | CEA                    | 29         | Yes       | No             | No                       | Yes                                |
|                                             | mean:          | 64.25      |               |                        | 27.75      |           |                |                          |                                    |
| HTA-2 arrays, RT-PCR                        | 7              | 39         | F             | PAN                    | 26         | No        | No             | No                       | No                                 |
|                                             | 8              | 47         | F             | PAN                    | 24         | No        | No             | No                       | No                                 |
|                                             | 9              | 43         | F             | PAN                    | 37         | No        | No             | No                       | No                                 |
|                                             | 11             | 35         | F             | PAN                    | 30         | Yes       | Yes            | No                       | No                                 |
|                                             | mean:          | 41         |               |                        | 29.25      |           |                |                          |                                    |
| NSG-HFD at thermoneutrality                 | 12             | 35         | F             | PAN                    | 30         | No        | No             | No                       | No                                 |
|                                             | 15             | 50         | F             | PAN                    | 41         | Yes       | No             | Yes                      | Yes                                |
|                                             | mean:          | 42.5       |               |                        | 35.5       |           |                |                          |                                    |
| NSG-Room Temperature; Metabolic Phenotyping | 18             | 63         | F             | PAN                    | 36         | No        | No             | No                       | No                                 |
|                                             | 19             | 58         | M             | PAN                    | 32         | No        | No             | No                       | Yes                                |
|                                             | mean:          | 60.5       |               |                        | 34         |           |                |                          |                                    |

CEA: carotid endarterectomy; PAN: panniculectomy; BMI: body mass index, at time of surgery; DM: Diabetes Mellitus

## Supplementary Table 2. Probes used for RT-PCR

| Gene               | Forward ; Reverse                                |
|--------------------|--------------------------------------------------|
| Mouse <i>Ucp1</i>  | GTGAACCCGACAACCTCCGAA ; TGCCAGGCAAGCTGAAACTC     |
| Human <i>UCP1</i>  | AGAAGGGCGGATGAAACTCT ; ATCCTGGACCGTGTCGTAG       |
| <i>PPARGC1A</i>    | TCTGAGTCTGTATGGAGTGACAT ; CCAAGTCGTTACATCTAGTTCA |
| <i>DIO2</i>        | GGATGCCCCCAATTCCAGTG ; GGCTCGTGAAAGGAGGTCAAG     |
| <i>CIDEA</i>       | TTATGGGATCACAGACTAAGCGA ; TGCTCCTGTCATGGTTGGAGA  |
| <i>PRDM16</i>      | CTTCGGATGGGAGCAAATACTG ; TCCACGCAGAACTTCTCACTG   |
| Human <i>PLIN1</i> | ACCAGCAAGCCCAGAAGTC ; CATGGTCTGCACGGTGTATC       |
| <i>ADIPOQ</i>      | TGCTGGGAGCTGTTCTACTG ; TACTCCGGTTTCACCGATGTC     |
| <i>LEP</i>         | TGCCTTCCAGAAACGTGATCC ; CTCTGTGGAGTAGCCTGAAGC    |
| <i>PPARG</i>       | GGGATCAGCTCCGTGGATCT ; TGCACTTTGGTACTCTTGAAGTT   |
| <i>PDK4</i>        | GGAGCATTCTCGCGCTACA ; ACAGGCAATTCTTGTCGCAAA      |
| <i>CD137</i>       | AGCTGTTACAACATAGTAGCCAC ; GGACAGGGACTGCAAATCTGAT |
| <i>CITED</i>       | CCTCACCTGCGAAGGAGGA ; GGAGAGCCTATTGGAGATCCC      |
| <i>TBX1</i>        | ACGACAACGGCCACATTATTC ; CCTCGGCATATTTCTCGCTATCT  |
| <i>TMEM26</i>      | ATGGAGGGACTGGTCTTCCTT ; CTTCACCTCGGTCACTCGC      |
| <i>EVA1</i>        | TTAATGGGACAGATGCTCGGT ; AAGACACCCGGTCCTTAAACC    |
| <i>LHX8</i>        | GAATGACCTATGCTGGCATGT ; ACCCAGTCAGTAGAATGGATGTG  |
| <i>PENK</i>        | CTGGATGGCATTGTGACGGAT ; GCCCCAGCTTGCACTGTAAA     |
| <i>PCSK1</i>       | CGGTTCTGACACTTTGCACT ; CACATTCCATTACGCAAGCCA     |
| <i>IL33</i>        | GTGACGGTGTGATGGTAAGAT ; AGCTCCACAGAGTGTTCTTG     |
| <i>SLC2A4</i>      | TGGGCGGCATGATTTCTC ; GCCAGGACATTGTTGACCAG        |
| <i>FABP4</i>       | ACTGGGCCAGGAATTTGACG ; CTCGTGGAAGTGACGCCTT       |
| <i>RPL4</i>        | GCCTGCTGTATTCAAGGCTC ; GGTTGGTGCAAACATTCGGC      |
